# Supplementary material for: Basilar Artery Plaque and Pontine Infarction Location and Vascular Geometry
Source: PubMed Central journal article supplement — J Stroke. 2018 Jan 31;20(1):92–8. doi: 10.5853/jos.2017.00829 (PMC5836573; doi:10.5853/jos.2017.00829), 2018-01-31
Supplement: jos-2017-00829-suppl1.pdf [file jos-2017-00829-suppl1.pdf]

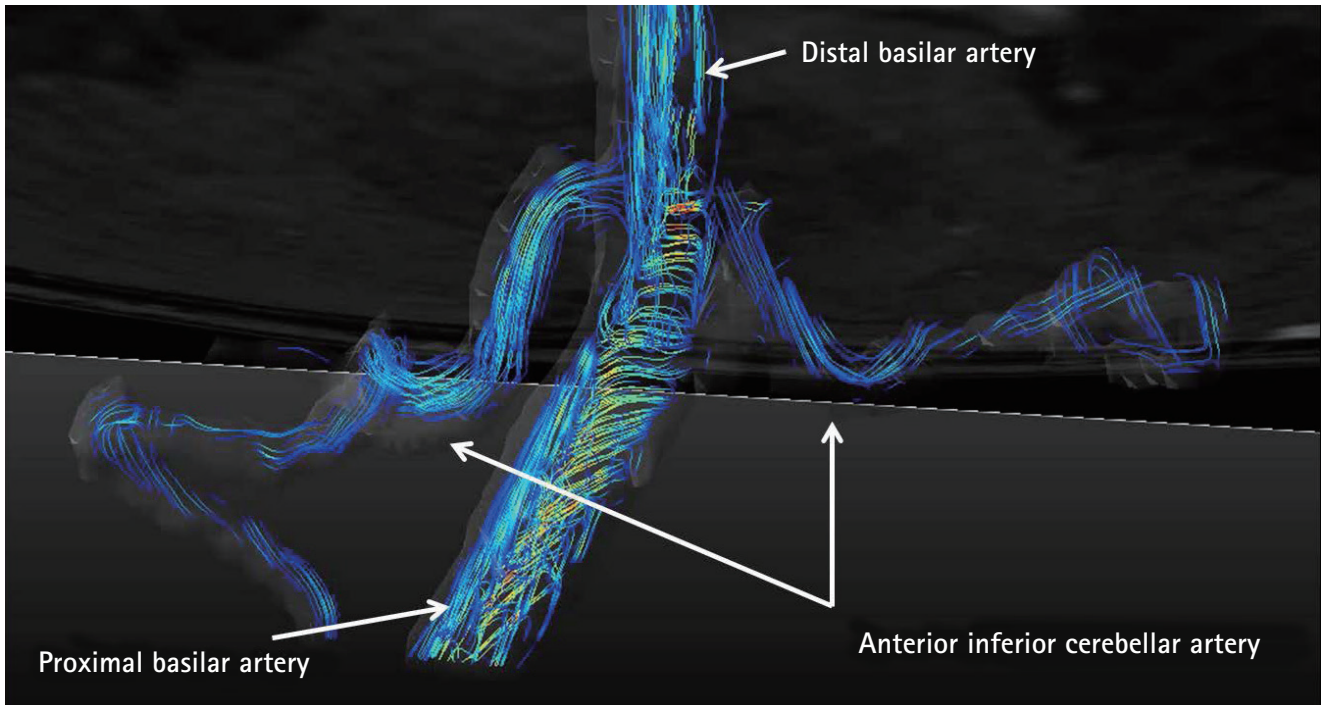

**Supplementary Figure 1.** Real-time flow measurement of a patient with rostral pontine infarction. Flow pattern of distal basilar artery recovers to laminar flow pattern, whereas turbulence is observed from the middle and proximal basilar artery.
